# Supplementary material for: Effect of glyphosate on X-ray diffraction of copper films prepared by electrochemical deposition
Source: Royal Society of Chemistry journal article supplement (doi:10.1039/c9ra01385g), 2019-01-01
Supplement: c9ra01385g1.pdf [file c9ra01385g1.pdf]

*Electronic Supplementary Information (ESI) for*

**Effect of glyphosate on X-ray diffraction of copper films  
prepared by electrochemical deposition**

Gaomin Zhang <sup>a</sup>, Bin Xu <sup>b</sup>, Hui Chong <sup>a</sup>, Wenxian Wei <sup>b</sup>, Chengyin Wang <sup>a, b\*</sup>, Guoxiu Wang <sup>a, c\*</sup>

<sup>a</sup> College of Chemistry and Chemical Engineering, Yangzhou University, Yangzhou 225002,  
China

<sup>b</sup> Testing center, Yangzhou University, Yangzhou 225009, China

<sup>c</sup> Centre for Clean Energy Technology, Faculty of Science, University of Technology Sydney,  
Sydney, NSW, Australia

\*Corresponding author: Email: [wangcy@yzu.edu.cn](mailto:wangcy@yzu.edu.cn) (Chengyin Wang) and  
[Guoxiu.Wang@uts.edu.au](mailto:Guoxiu.Wang@uts.edu.au) (Guoxiu Wang)

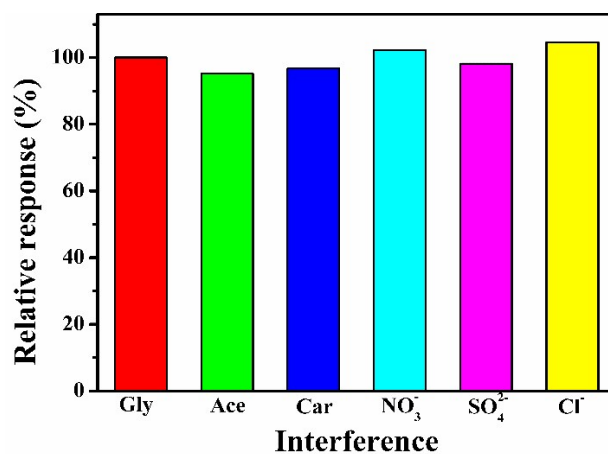

**Fig. S1** Effect of different interferences. The concentration of glyphosate was  $1 \times 10^{-7}$  mol L<sup>-1</sup>, and others were  $1 \times 10^{-5}$  mol L<sup>-1</sup>.

**Table S1** Comparison with various methods of the glyphosate detection

| Methods                                    | Linear Range ( $\mu\text{g L}^{-1}$ ) | LOD ( $\mu\text{g L}^{-1}$ ) | Reference       |
|--------------------------------------------|---------------------------------------|------------------------------|-----------------|
| Colorimetric                               | $1 \times 10^2 - 5 \times 10^5$       | $1 \times 10^2$              | [1]             |
| LC-FLD + MS/MS                             | 0.1 - 50.0                            | 0.058                        | [2]             |
| Microchip electrophoresis                  | 0.17 - 845                            | 0.05                         | [3]             |
| Electrogenerated<br>chemiluminescence      | $1.69 \times 10^2 - 1.69 \times 10^3$ | 50.7                         | [4]             |
| X-ray diffraction and<br>electrodeposition | $1.7 \times 10^{-4} - 1.7 \times 10$  | $4.3 \times 10^{-5}$         | Present<br>work |

## References

- [1] L.K.S. De Almeida, S. Chigome, N. Torto, C.L. Frost and B.I. Pletschke, *Sensor. Actuat. B-Chem.*, 2015, **206**, 357-363.
- [2] C.E. Ramirez, S. Bellmund and P.R. Gardinali, *Sci. Total Environ.*, 2014, **496**, 389-401.
- [3] X. Wei, X. Gao, L. Zhao, X. Peng, L. Zhou, J. Wang and Q. Pu, *J. Chromatogra. A*, 2013, **1281**, 148-154.
- [4] A. Habekost, *Talanta*, 2017, **162**, 583-588.
